# Supplementary material for: Prussian blue analogues with Na2NixCoyMnzFe(CN)6-multimetallic structures as positive and hydrogen vanadate as negative electrodes in aqueous Na-ion batteries for solar energy storage applications
Source: Royal Society of Chemistry journal article supplement (doi:10.1039/d4ya00178h), 2024-01-01
Supplement: d4ya00178h1.pdf [file d4ya00178h1.pdf]

## Supporting Information

### Prussian Blue Analogues with $\text{Na}_2\text{Ni}_x\text{Co}_y\text{Mn}_z\text{Fe}(\text{CN})_6$ -Multimetallic Structures as Positive and Hydrogen Vanadate as Negative Electrodes in Aqueous Na-Ion Batteries for Solar Energy Storage Applications

Pappu Naskar<sup>a</sup>, Biplab Biswas<sup>a</sup>, Sourav Laha<sup>b,\*</sup> and Anjan Banerjee<sup>a,\*</sup>

<sup>a</sup>Department of Chemistry, Presidency University-Kolkata, Kolkata-700073, India

<sup>b</sup>Department of Chemistry, National Institute of Technology Durgapur, Durgapur-713209, India

#### Calculations of Diffusion Coefficient (D)

The diffusion coefficients (D) of Na ions in the host structures of PBAs are calculated from EIS data by using Eq. S1.[S1]

$$D = 0.5 \times R^2 \times T^2 \times A^{-2} \times n^{-4} \times F^{-4} \times C^{-2} \times \sigma^{-2} \dots\dots\dots (S1)$$

Herein, R = universal gas constant

T = absolute temperature

A = geometrical area of the electrode

n = number of electron transfers per molecule during oxidation and reduction

F = Faraday constant

C = molar concentration of sodium ions (mole/cm<sup>3</sup>)

$\sigma$  = Warburg factor, which is connected to the real component of impedance ( $Z'$ )

The following equation shows the relationship between  $Z'$  and  $\sigma$ .

$$Z' = R_s + R_{ct} + \sigma \omega^{-1/2} \dots\dots\dots (S2)$$

Wherein,  $\omega$  is the frequency in EIS study.

The linear relationship profiles of  $Z'$  with  $\omega^{-1/2}$  for PBA-1, PBA-2, PBA-3 and HVO are shown in Figure S1 (a-d), respectively. The Warburg factors ( $\sigma$ ) are calculated from the slope of the fitted straight line.

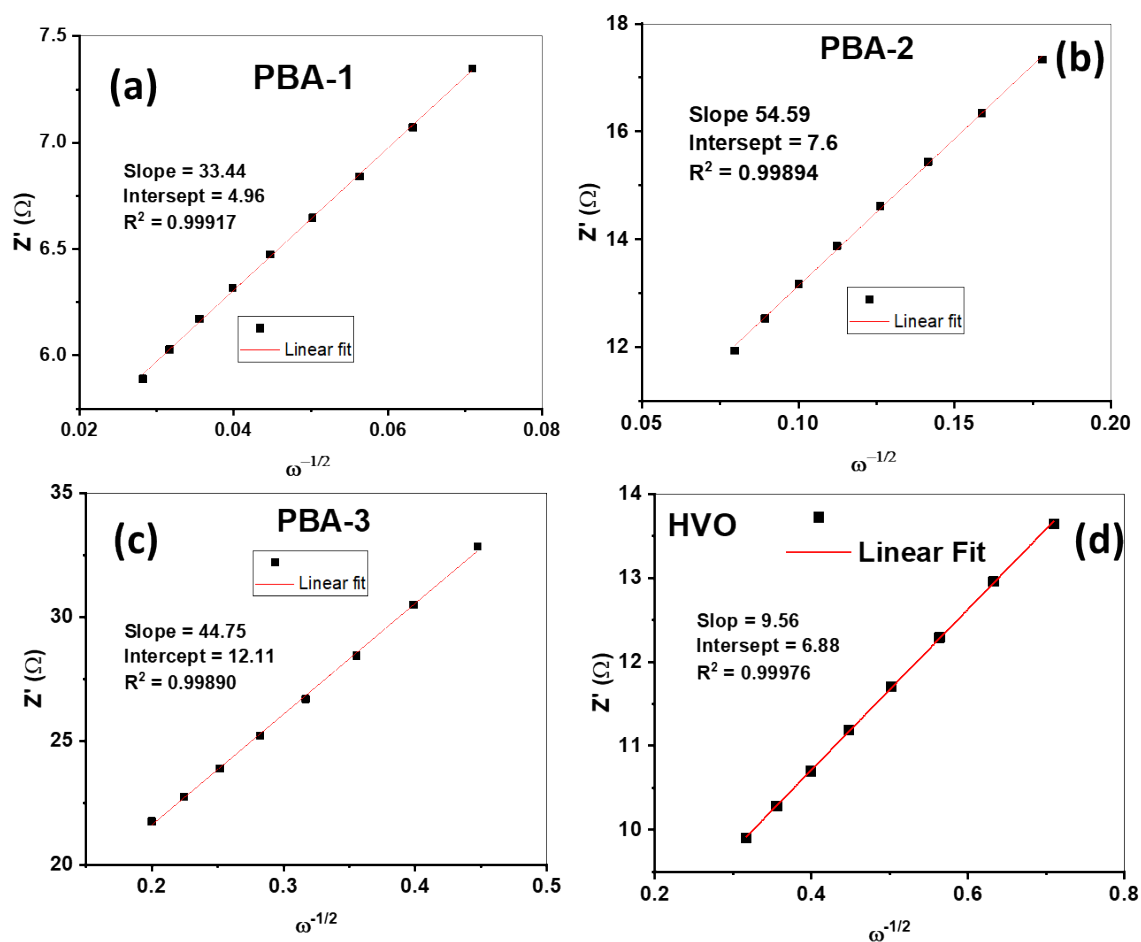

**Figure S1:** The linear relationship between  $Z'$  and  $\omega^{-1/2}$  at low-frequency region in EIS ( $\omega$  = angular frequency) for (a) PBA-1, (b) PBA-2, (c) PBA-3 and (d) HVO.

**Table S1.** Calculation of Na-ion diffusion coefficient for PBA-1, PBA-2, PBA-3 and HVO

| Parameter / Unit                           | PBA-1                  | PBA-2                  | PBA-3                  | HVO                    |
|--------------------------------------------|------------------------|------------------------|------------------------|------------------------|
| $R$ (J K <sup>-1</sup> mol <sup>-1</sup> ) | 8.314                  | 8.314                  | 8.314                  | 8.314                  |
| $T$ (K)                                    | 303                    | 303                    | 303                    | 303                    |
| $A$ (cm <sup>2</sup> )                     | 1                      | 1                      | 1                      | 1                      |
| $n$                                        | 1.66                   | 1.5                    | 1.8                    | 2                      |
| $F$ (Coulomb mol <sup>-1</sup> )           | 96485                  | 96485                  | 96485                  | 96485                  |
| $\#C$ (mol cm <sup>-3</sup> )              | 0.0118                 | 0.012                  | 0.0118                 | 0.001                  |
| $\sigma$ (Ohm s <sup>-0.5</sup> )          | 33.44                  | 54.6                   | 44.75                  | 9.56                   |
| $D$ (cm <sup>2</sup> s <sup>-1</sup> )     | $3.09 \times 10^{-14}$ | $1.68 \times 10^{-14}$ | $1.29 \times 10^{-14}$ | $2.50 \times 10^{-11}$ |

# C value is calculated from the crystal structures of the active materials, which are established by Rietveld refinement of PXRD data.

|                                                                                                                                                                                                                                                                   |                                                                                                                                                                                                                                                                  |
|-------------------------------------------------------------------------------------------------------------------------------------------------------------------------------------------------------------------------------------------------------------------|------------------------------------------------------------------------------------------------------------------------------------------------------------------------------------------------------------------------------------------------------------------|
| <p><b>For PBA-1</b></p> <p>Formula unit per unit cell (Z) = 2</p> <p>Unit cell volume = 558.57 Å<sup>3</sup></p> <p>Therefore, 4 Na<sup>+</sup> ion present in 558.57 Å<sup>3</sup></p> <p>Hence, 0.0118 mole Na<sup>+</sup> ion present in 1 cm<sup>-3</sup></p> | <p><b>For PBA-2</b></p> <p>Formula unit per unit cell (Z) = 2</p> <p>Unit cell volume = 551.96 Å<sup>3</sup></p> <p>Therefore, 4 Na<sup>+</sup> ion present in 551.96 Å<sup>3</sup></p> <p>Hence, 0.012 mole Na<sup>+</sup> ion present in 1 cm<sup>-3</sup></p> |
| <p><b>For PBA-3</b></p> <p>Formula unit per unit cell (Z) = 2</p> <p>Unit cell volume = 558.39 Å<sup>3</sup></p> <p>Therefore, 4 Na<sup>+</sup> ion present in 558.39 Å<sup>3</sup></p> <p>Hence, 0.0118 mole Na<sup>+</sup> ion present in 1 cm<sup>-3</sup></p> | <p><b>For HVO [S2]</b></p> <p>The HVO structure does not contain Na.</p> <p>Hence, the concentration of Na (mol cm<sup>-3</sup>) in solid structure will be same with the electrolyte's concentration. Herein, C = 0.001 mol cm<sup>-3</sup></p>                 |

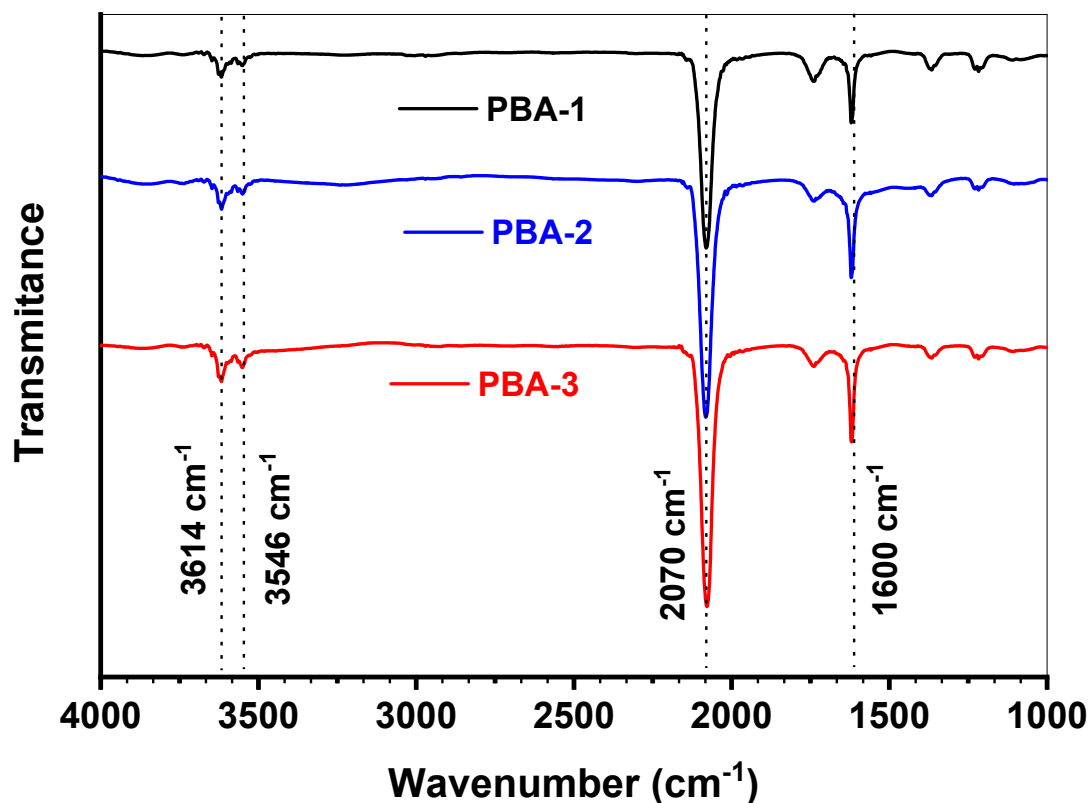

Figure S2: FT-IR spectra of PBA-1, PBA-2 and PBA-3.

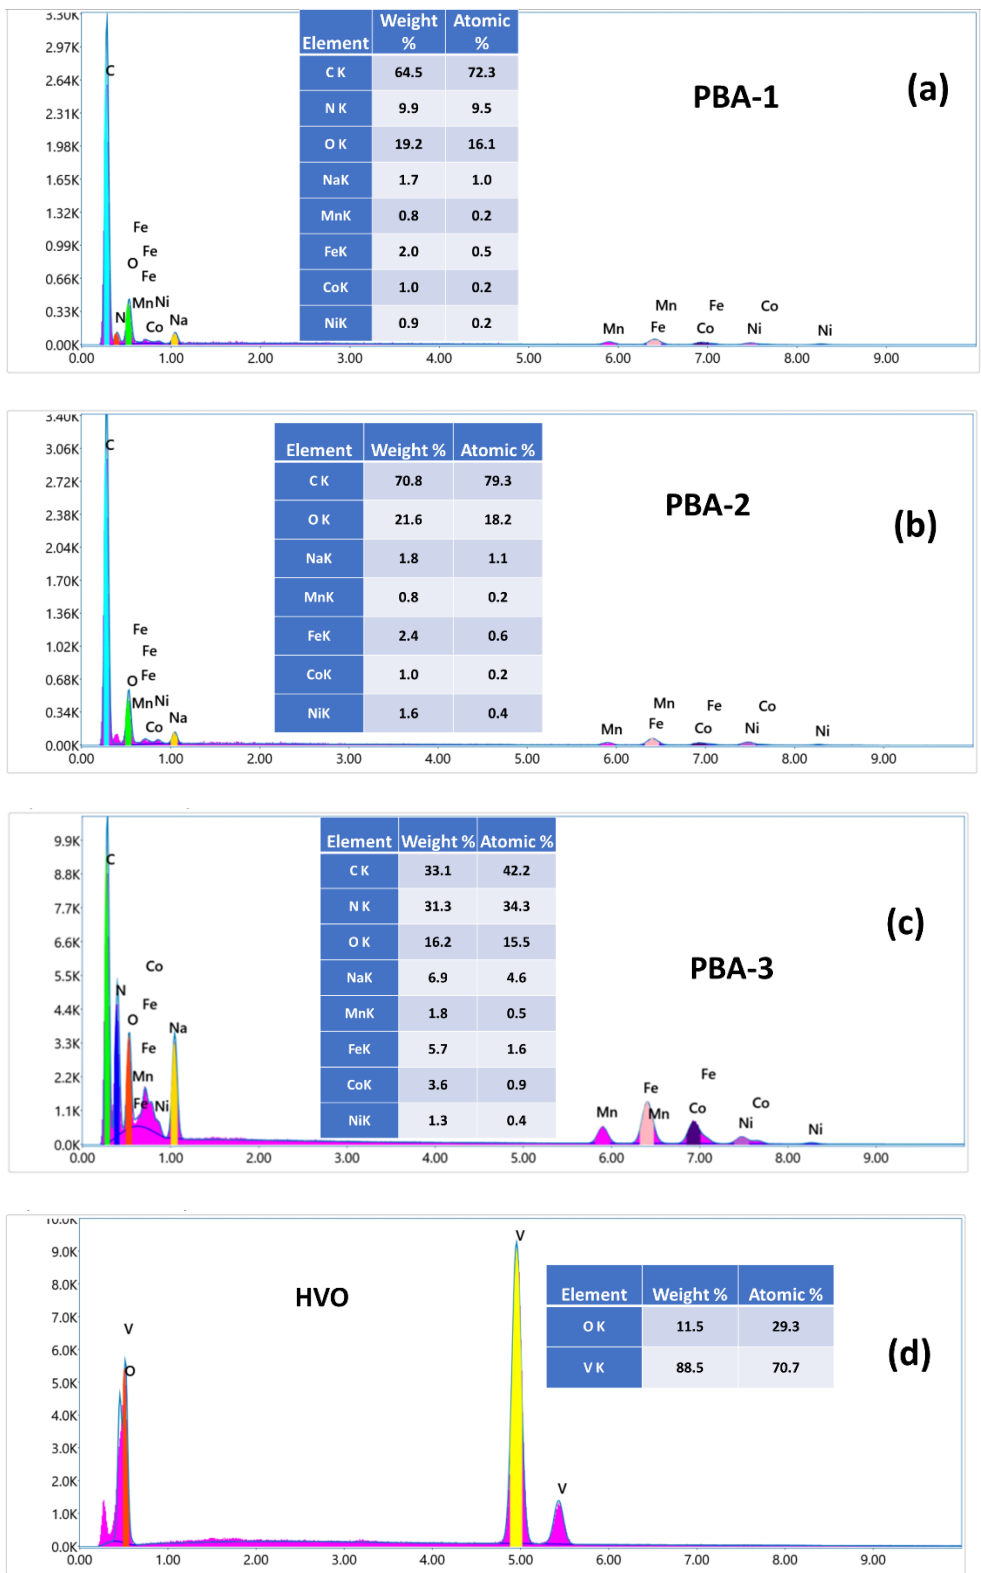

**Figure S3:** EDX profiles and elemental compositions of (a) PBA-1, (b) PBA-2, (c) PBA-3 and (d) HVO.

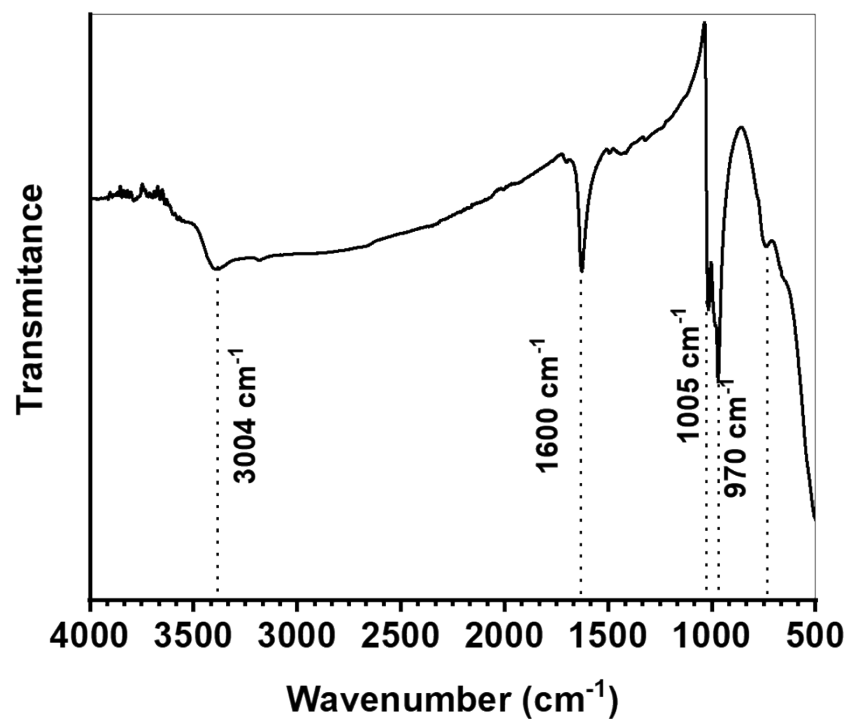

**Figure S4:** FT-IR spectrum of HVO.

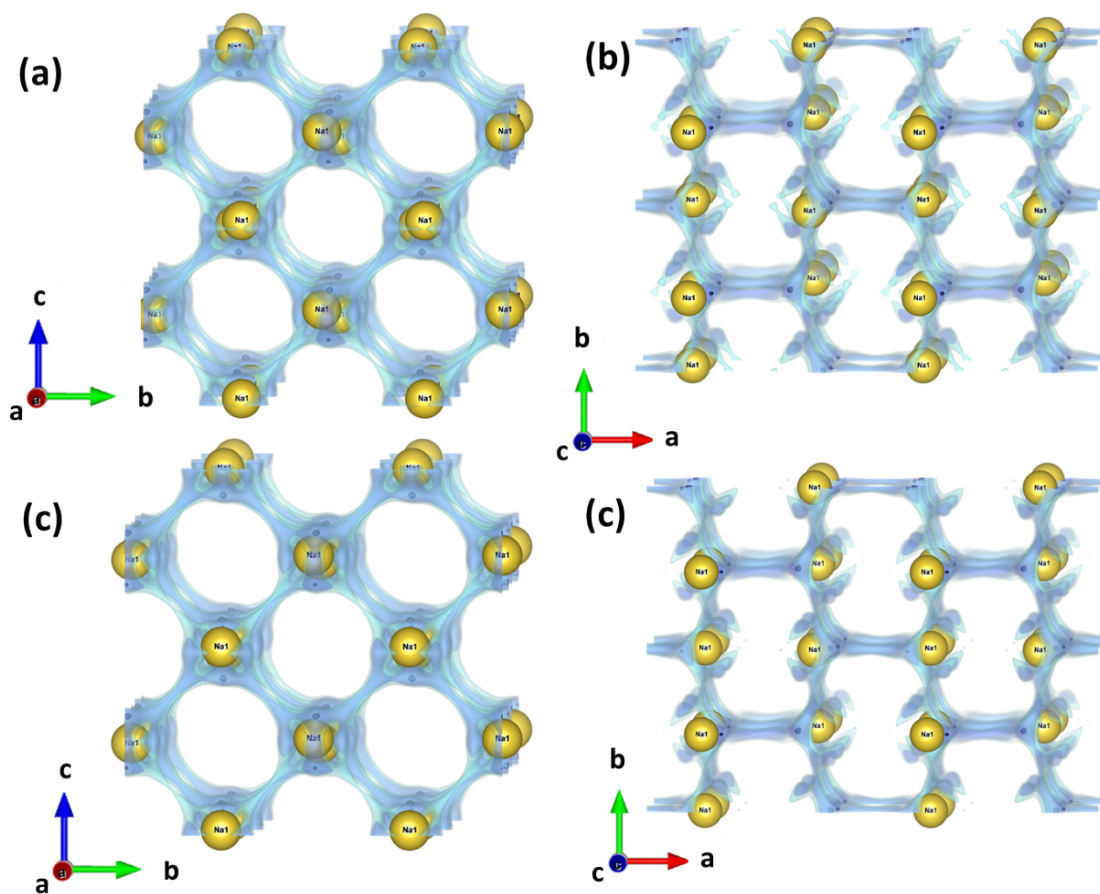

**Figure S5:** Na-ion diffusion pathways found from BVEL calculations for (a) PBA-2 in  $b$ - $c$  plane, (b) PBA-2 in  $a$ - $b$  plane, (c) PBA-3 in  $b$ - $c$  plane and (d) PBA-3 in  $a$ - $b$  plane.

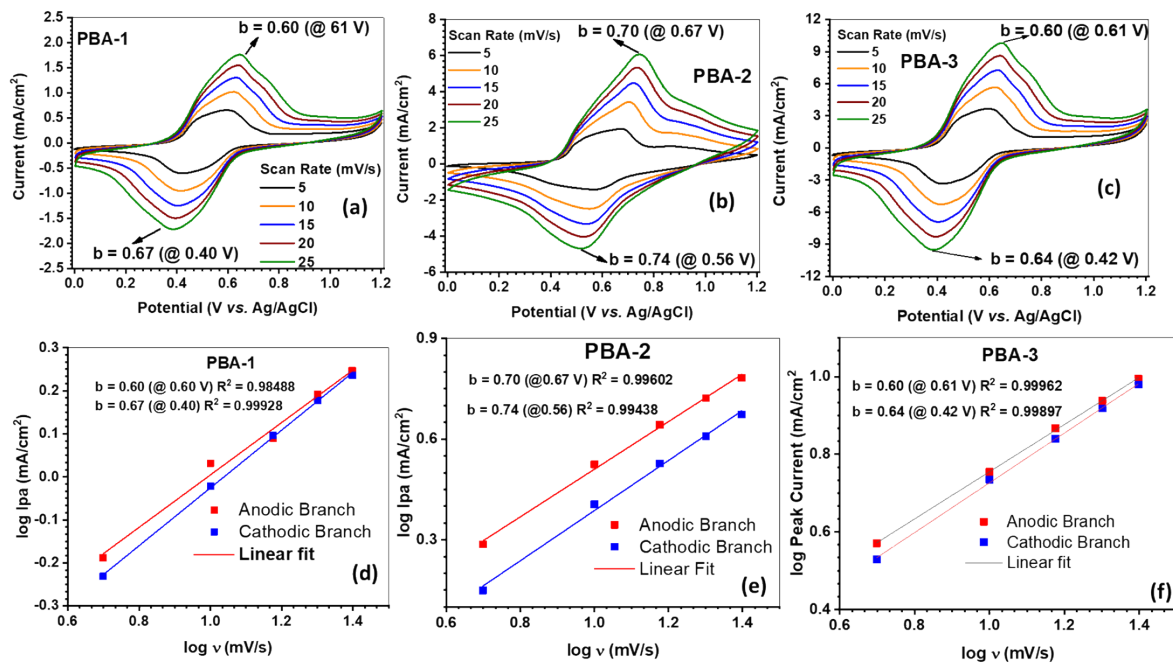

**Figure S6:** Cyclic voltammograms of (a) PBA-1, (b) PBA-2, (c) PBA-3 within 0-1.2 V vs. Ag/AgCl under the scan rate of 5 to 25 mV s<sup>-1</sup>; “b” value calculations at the anodic/cathodic peaks for (d) PBA-1, (e) PBA-2, (f) PBA-3.

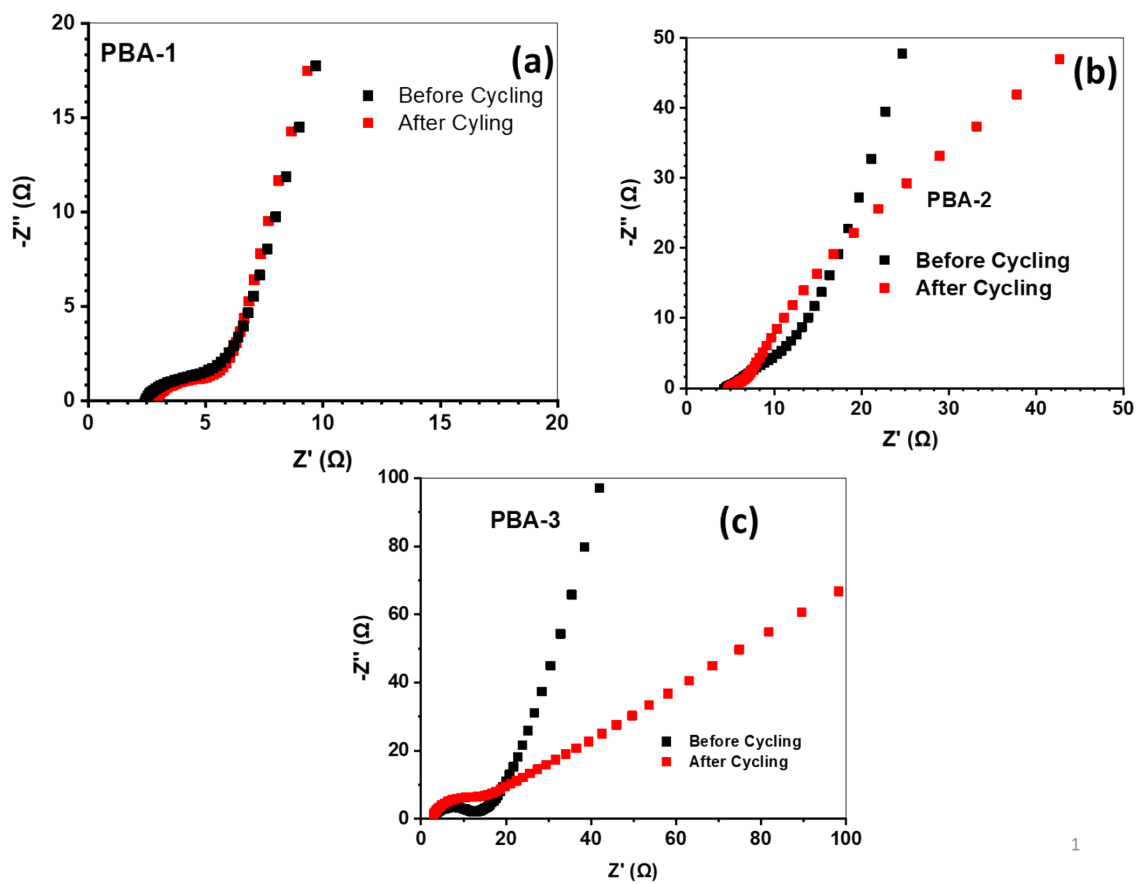

**Figure S7:** Nyquist plots at before and after cycling experiments for (a) PBA-1, (b) PBA-2 and (c) PBA-3.



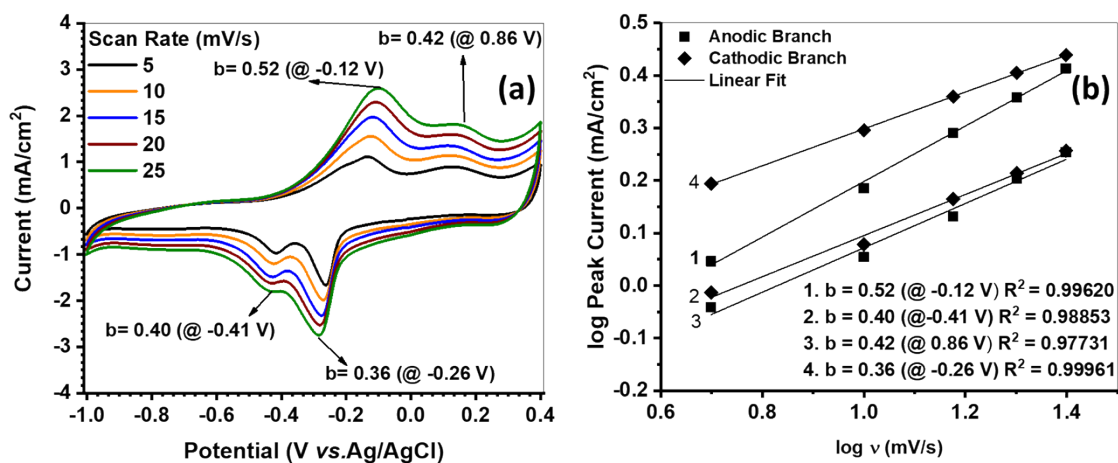

**Figure S8:** (a) Cyclic voltammograms of HVO within 0.4 to -1.0 V vs. Ag/AgCl under the scan rate of 5 to 25 mV s<sup>-1</sup>; (b) “b” value calculations at the cathodic/anodic peaks for HVO.

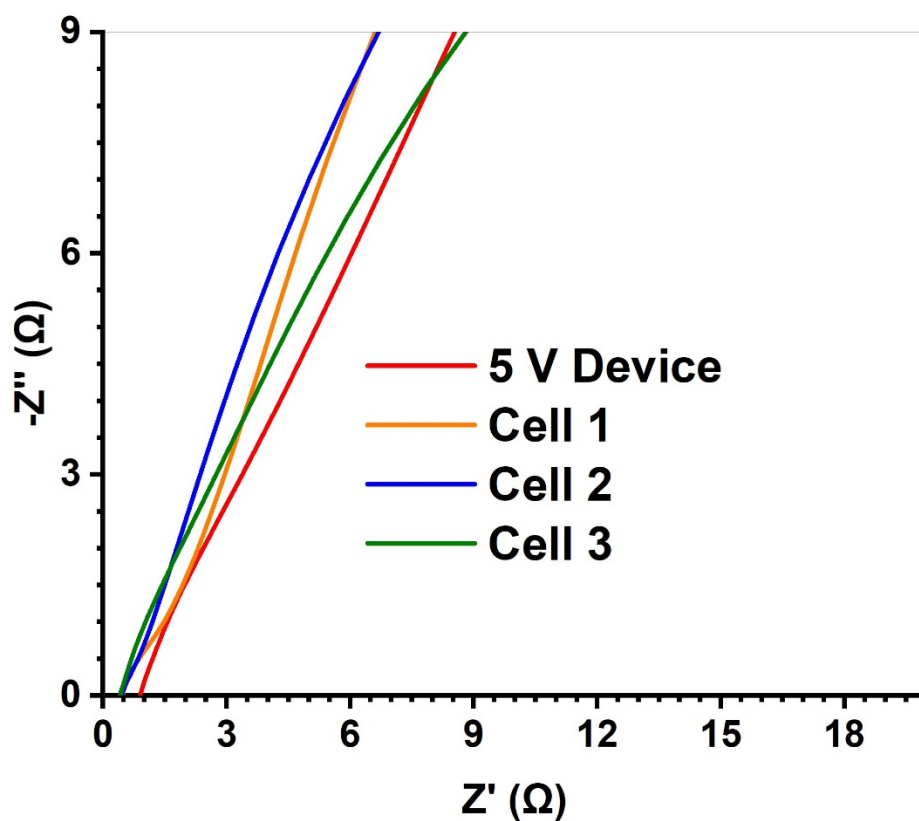

**Figure S9:** Nyquist plots for 5V device along with three constituent cells at their discharged states.

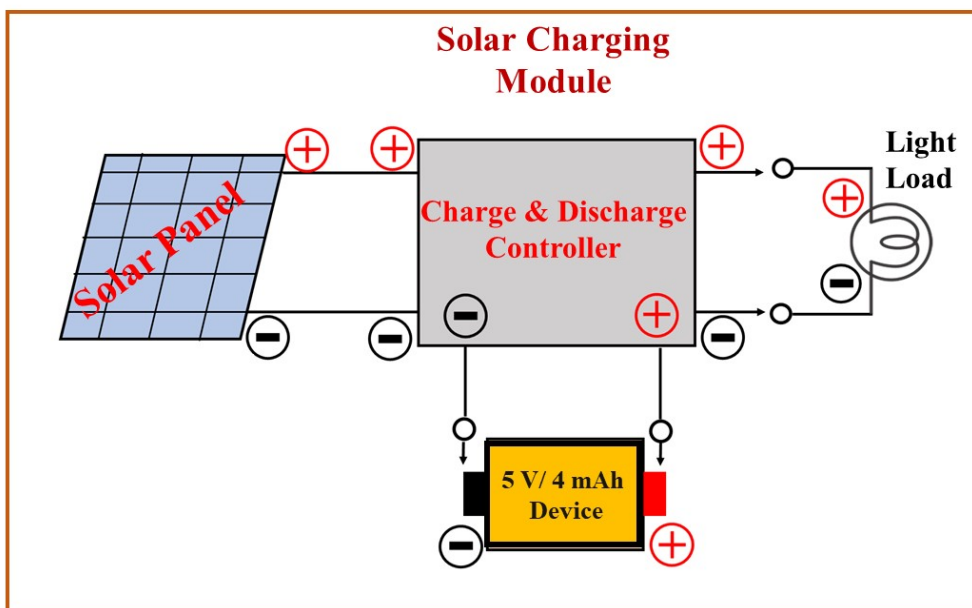

**Figure S10:** Schematic representation of customs-built solar-charging cum LED-discharging module for prototype battery testing.

## References

- S1. Y. Zhang, Z. Su and J. Ding, Synthesis and electrochemical properties of Ge-doped  $\text{Li}_3\text{V}_2(\text{PO}_4)_3/\text{C}$  cathode materials for lithium-ion batteries. *J. Alloys Compd.*, 2017, **702**, 427-431.
- S2. C. Liu, Z. Neale, J. Zheng, X. Jia, J. Huang, M. Yan, M. Tian, M. Wang, J. Yang and G. Cao, Expanded hydrated vanadate for high-performance aqueous zinc-ion batteries. *Energy & Environmental Science*, 2019, **12**, 2273-2285.
